# Supplementary material
Source: PubMed Central journal article supplement (PMC6882076)

Supplementary Figure 1. Flowsheet of inclusion and exclusion criteria.

## LONG-TERM RESIDENT COHORT

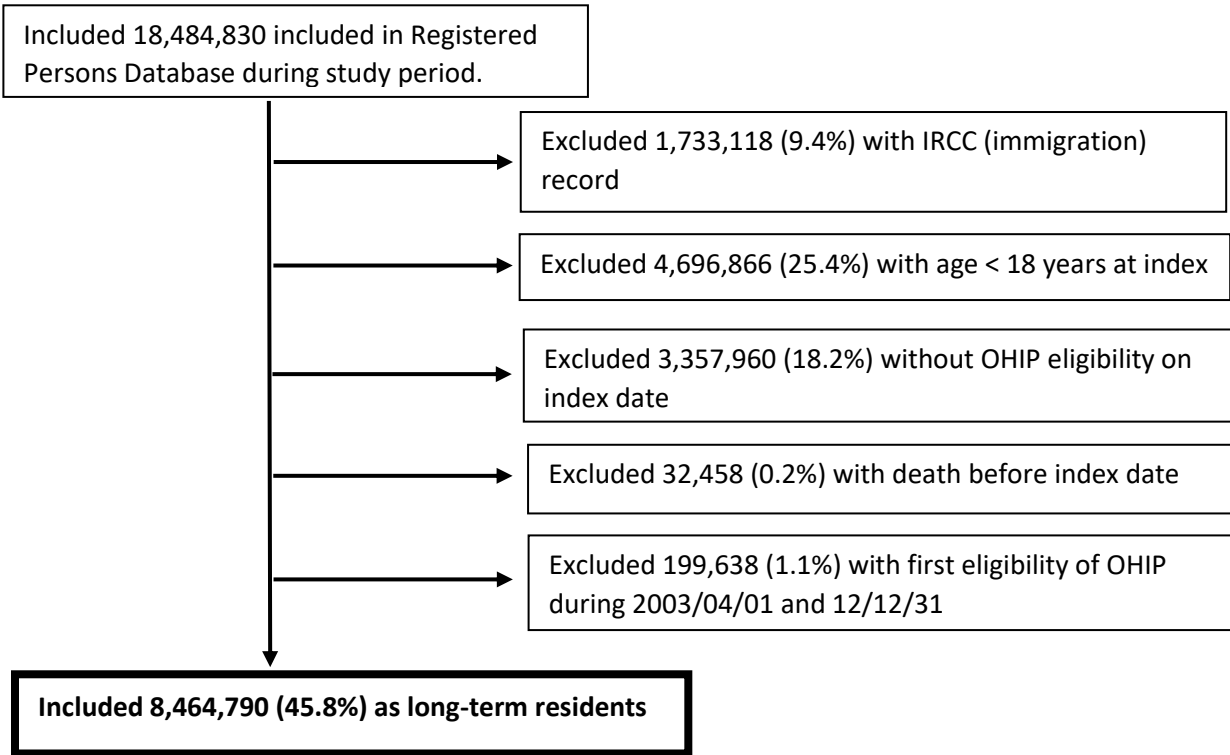

## IMMIGRANT COHORT

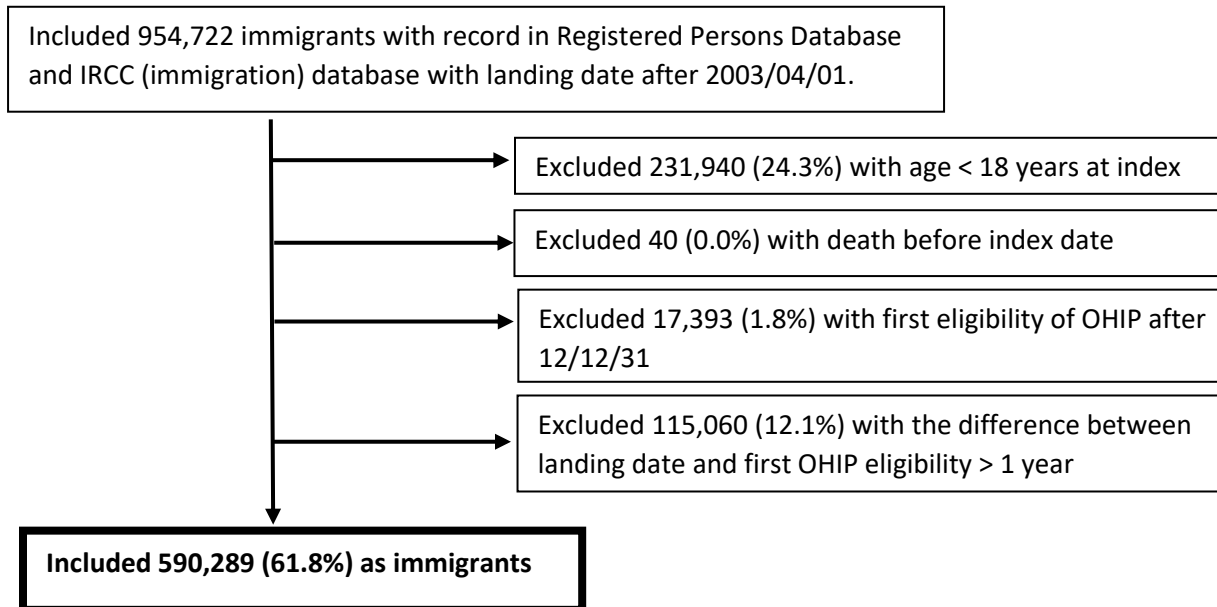

Supplement: 856851_Supplemental_Figure.pdf [file 856851_Supplemental_Figure.pdf]
