# Supplementary material
Source: PubMed Central journal article supplement (PMC6882076)
Supplement: 856851_Supplemental_Tables.pdf [file 856851_Supplemental_Tables.pdf]

**Supplementary Table 1. Emergency department visits for self-harm<sup>a</sup> with subsequent suicide event during observation window.**

|                                      | Suicide <sup>a</sup> | No suicide   | Total | <i>p</i> -value <sup>b</sup> | Mean days to suicide from self-harm visit ( $\pm$ SD) | Median days to suicide from self-harm visit (IQR) |
|--------------------------------------|----------------------|--------------|-------|------------------------------|-------------------------------------------------------|---------------------------------------------------|
| <b>Immigrants<br/>n (%)</b>          | 11 (0.6)             | 1880 (99.4)  | 1891  | 0.0033                       | 583.5 ( $\pm$ 472.6)                                  | 389 (257 - 1035)                                  |
| <b>Long-term residents<br/>n (%)</b> | 765 (1.4)            | 54849 (98.6) | 55614 |                              | 733.7 ( $\pm$ 762.8)                                  | 483 (128 - 1087)                                  |

<sup>a</sup>Emergency department self-harm restricted to visits before 2014 as suicide data only available until 2014.

<sup>b</sup>Differences between suicide following self-harm tested using Chi-squared test.

**Supplementary Table 2. Number and proportion hospitalized following a visit to the emergency department for self-harm.**

| <b>By immigrant status</b>     |              |                  |       |                              |
|--------------------------------|--------------|------------------|-------|------------------------------|
|                                | Hospitalized | Not Hospitalized | Total | <i>p</i> -value <sup>b</sup> |
| Immigrants, n (%)              | 909 (40.3)   | 1347 (59.7)      | 2256  | <.0001                       |
| Long-term residents, n (%)     | 32446 (47.7) | 35593 (52.3)     | 68039 |                              |
| <b>By immigrant visa class</b> |              |                  |       |                              |
| Economic, n (%)                | 215 (37.5)   | 359 (62.5)       | 574   | 0.151                        |
| Refugee, n (%)                 | 154 (38.8)   | 242 (61.1)       | 396   |                              |
| Family/Other/Missing, n (%)    | 540 (42.0)   | 746 (58.0)       | 1286  |                              |

<sup>a</sup>Combined Business with Economic Class

<sup>b</sup>Differences tested using Chi-squared test.

| <b>Supplementary Table 3. Number of events and rates of suicide and self-harm by among immigrants and long-term residents using direct standardization.</b> |                        |                              |                            |                              |                       |                             |                             |                             |
|-------------------------------------------------------------------------------------------------------------------------------------------------------------|------------------------|------------------------------|----------------------------|------------------------------|-----------------------|-----------------------------|-----------------------------|-----------------------------|
|                                                                                                                                                             | Suicide                |                              |                            |                              | Self-Harm             |                             |                             |                             |
|                                                                                                                                                             | Immigrants (N =130)    |                              | Non-immigrants (N = 6,354) |                              | Immigrants (N =2,256) |                             | Non-immigrants (N = 68,039) |                             |
|                                                                                                                                                             | Crude rate/ 100K (CI)  | Standardized rate/ 100K (CI) | Crude rate/ 100K (CI)      | Standardized rate/ 100K (CI) | Crude rate/ 10K (CI)  | Standardized rate/ 10K (CI) | Crude rate/ 10K (CI)        | Standardized rate/ 10K (CI) |
| <b>Overall</b>                                                                                                                                              | 3.33 (2.78 - 3.95)     | 3.66 (2.90 - 4.56)           | 11.80 (11.52 - 12.10)      | 11.76 (11.47 - 12.05)        | 4.44 (4.26 - 4.63)    | 3.42 (3.24 - 3.60)          | 9.73 (9.65 - 9.80)          | 9.61 (9.54 - 9.69)          |
| <b>Immigration status</b>                                                                                                                                   | N/A                    |                              |                            |                              | N/A                   |                             |                             |                             |
| Business                                                                                                                                                    | Combined with Economic |                              |                            |                              | 5.22 (3.61 - 7.29)    | -                           |                             |                             |
| Economic                                                                                                                                                    | 2.77 (2.03 - 3.70)     | -                            |                            |                              | 2.60 (2.38 - 2.83)    | -                           |                             |                             |
| Refugee                                                                                                                                                     | 6.12 (3.88 - 9.18)     | -                            |                            |                              | 8.09 (7.31 - 8.93)    | 6.53 (5.63 - 7.52)          |                             |                             |
| Family                                                                                                                                                      | 3.26 (2.50 - 4.19)     | 3.45 (2.54 - 4.59)           |                            |                              | 5.26 (4.98 - 5.56)    | 3.95 (3.69 - 4.21)          |                             |                             |
| <b>Neighbourhood income quintile</b>                                                                                                                        |                        |                              |                            |                              |                       |                             |                             |                             |
| Quintile 1 <sup>a</sup>                                                                                                                                     | 3.97 (3.00 - 5.16)     | -                            | 16.17 (15.37 - 17.00)      | 16.29 (15.48 - 17.13)        | 4.35 (4.05 - 4.66)    | 3.25 (2.94 - 3.58)          | 15.86 (15.64 - 16.09)       | 15.46 (15.24 - 15.68)       |
| Quintile 2                                                                                                                                                  | 2.58 (1.66 - 3.84)     | -                            | 12.93 (12.25 - 13.64)      | 12.91 (12.23 - 13.62)        | 4.79 (4.41 - 5.20)    | 3.62 (3.26 - 4.02)          | 10.70 (10.53 - 10.87)       | 10.56 (10.39 - 10.73)       |
| Quintile 3                                                                                                                                                  | 2.02 (1.10 - 3.39)     | -                            | 11.52 (10.88 - 12.18)      | 11.43 (10.80 - 12.09)        | 4.56 (4.13 - 5.02)    | 3.53 (3.14 - 3.97)          | 8.83 (8.67 - 8.99)          | 8.70 (8.55 - 8.86)          |
| Quintile 4                                                                                                                                                  | 4.10 (2.54 - 6.27)     | -                            | 9.72 (9.15 - 10.31)        | 9.68 (9.11 - 10.27)          | 4.43 (3.94 - 4.97)    | 3.47 (3.04 - 3.95)          | 7.66 (7.52 - 7.80)          | 7.61 (7.47 - 7.75)          |
| Quintile 5                                                                                                                                                  | 3.61 (1.87 - 6.31)     | -                            | 9.32 (8.77 - 9.89)         | 9.28 (8.74 - 9.85)           | 3.75 (3.20 - 4.37)    | 3.08 (2.57 - 3.66)          | 6.62 (6.49 - 6.75)          | 6.71 (6.58 - 6.85)          |
| <b>Rurality</b>                                                                                                                                             |                        |                              |                            |                              |                       |                             |                             |                             |
| Urban                                                                                                                                                       | 3.26 (2.71 - 3.89)     | 3.60 (2.83 - 4.51)           | 11.22 (10.88 - 11.57)      | 11.19 (10.85 - 11.54)        | 4.39 (4.21 - 4.58)    | 3.35 (3.18 - 3.54)          | 9.53 (9.44 - 9.62)          | 9.33 (9.25 - 9.42)          |
| Rural <sup>b</sup>                                                                                                                                          | 5.50 (2.21 - 11.33)    | -                            | 12.65 (12.12 - 13.19)      | 12.55 (12.02 - 13.09)        | 6.69 (5.39 - 8.20)    | -                           | 9.72 (9.59 - 9.85)          | 9.82 (9.69 - 9.96)          |
| a. Combined with missing to prevent back-calculation of small cells sizes as per institutional policy                                                       |                        |                              |                            |                              |                       |                             |                             |                             |
| b. Standardized using direct standardization to the 2011 Canadian population                                                                                |                        |                              |                            |                              |                       |                             |                             |                             |
| CI, 95% Confidence Intervals                                                                                                                                |                        |                              |                            |                              |                       |                             |                             |                             |
